# Supplementary material for: lncRNA GAS6-AS1 inhibits progression and glucose metabolism reprogramming in LUAD via repressing E2F1-mediated transcription of GLUT1
Source: PubMed Central journal article supplement — Mol Ther Nucleic Acids. 2021 May 1;25:11–24. doi: 10.1016/j.omtn.2021.04.022 (PMC8181633; doi:10.1016/j.omtn.2021.04.022), 2021-05-01
Supplement: mmc1.pdf [file mmc1.pdf]

OMTN, Volume 25

## **Supplemental information**

### **lncRNA GAS6-AS1 inhibits progression and glucose metabolism reprogramming in LUAD via repressing E2F1-mediated transcription of GLUT1**

**Jing Luo, Huishan Wang, Li Wang, Gaoming Wang, Yu Yao, Kai Xie, Xiaokun Li, Lin Xu, Yi Shen, and Binhui Ren**

A

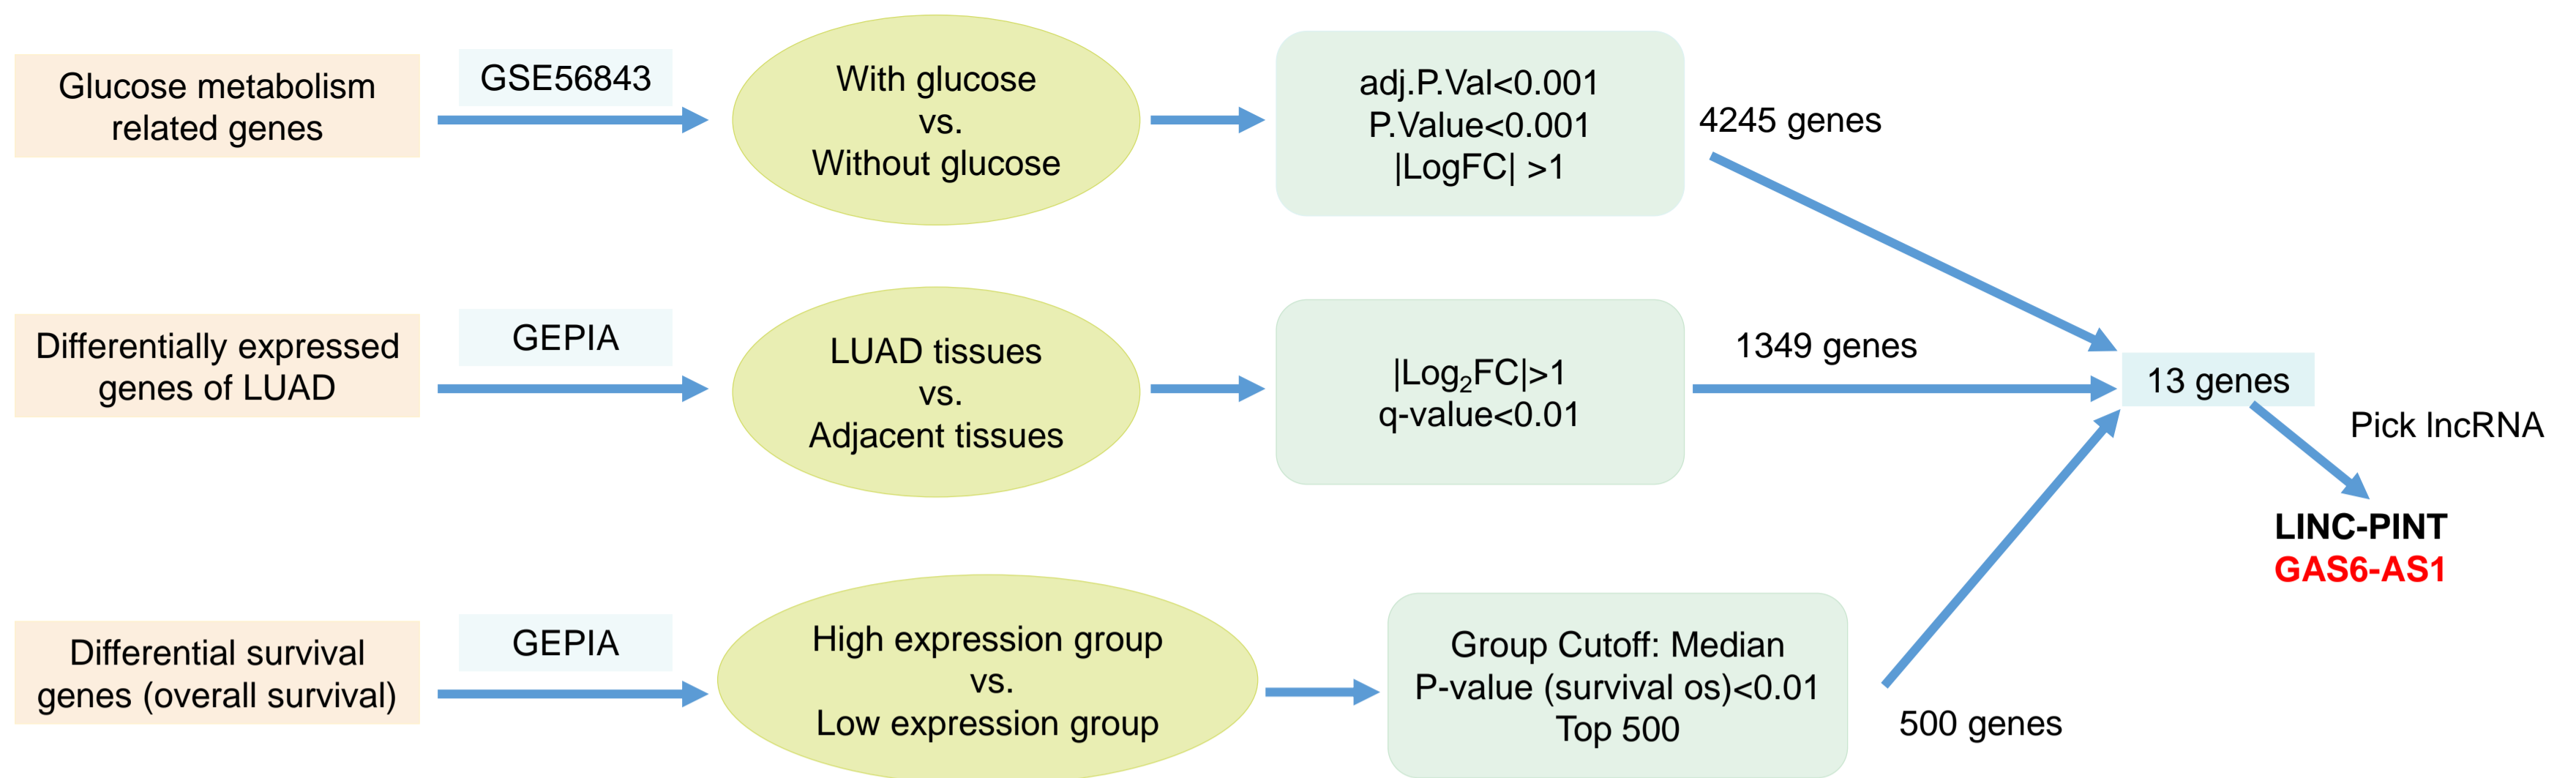

B

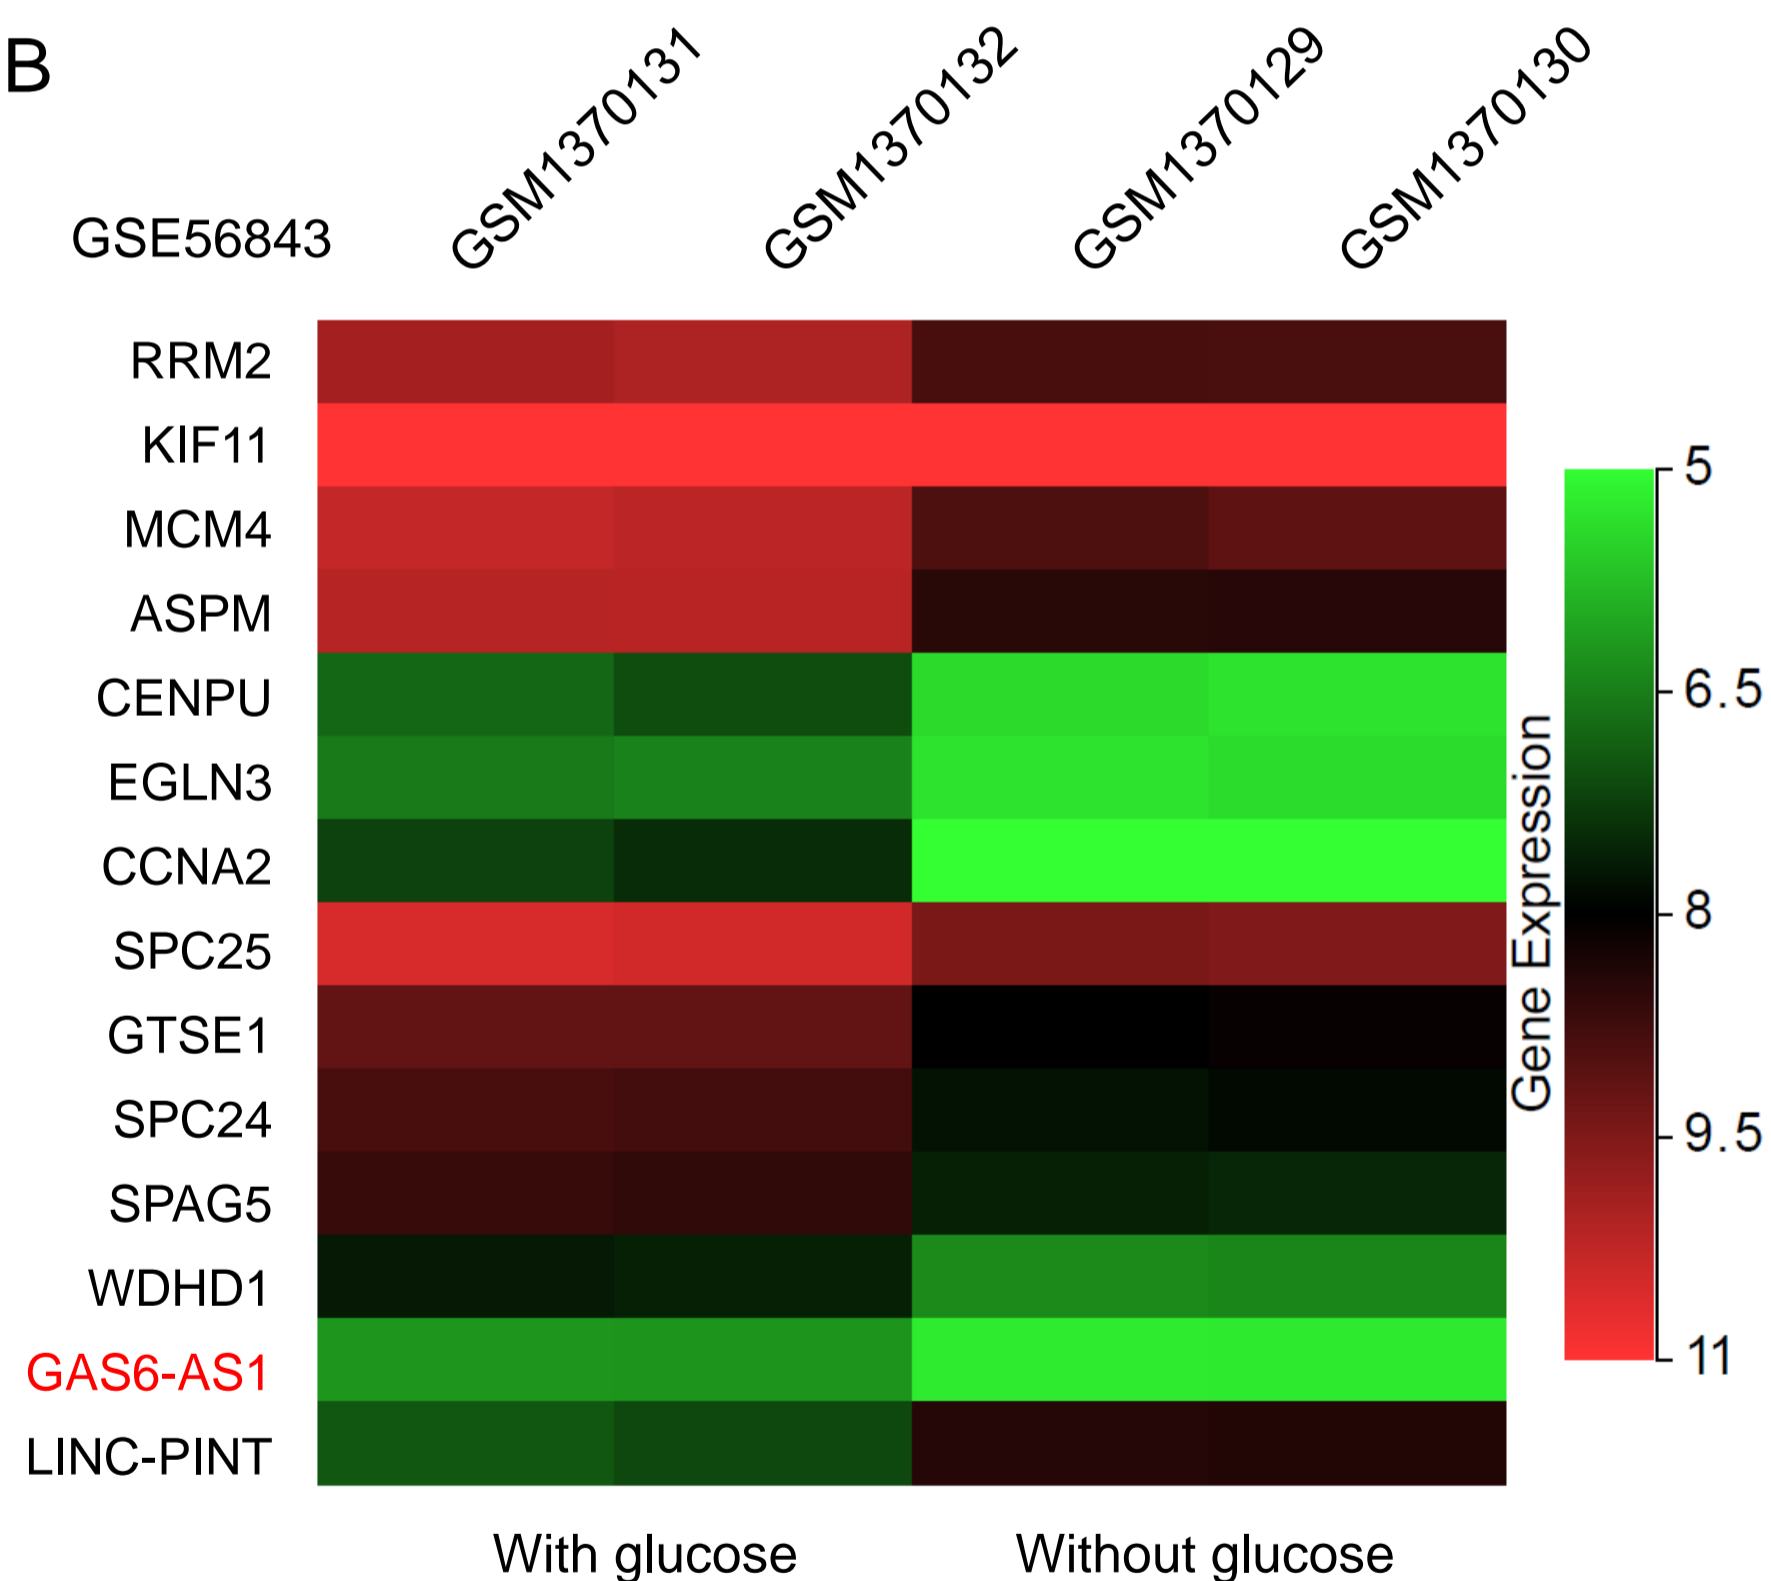

C

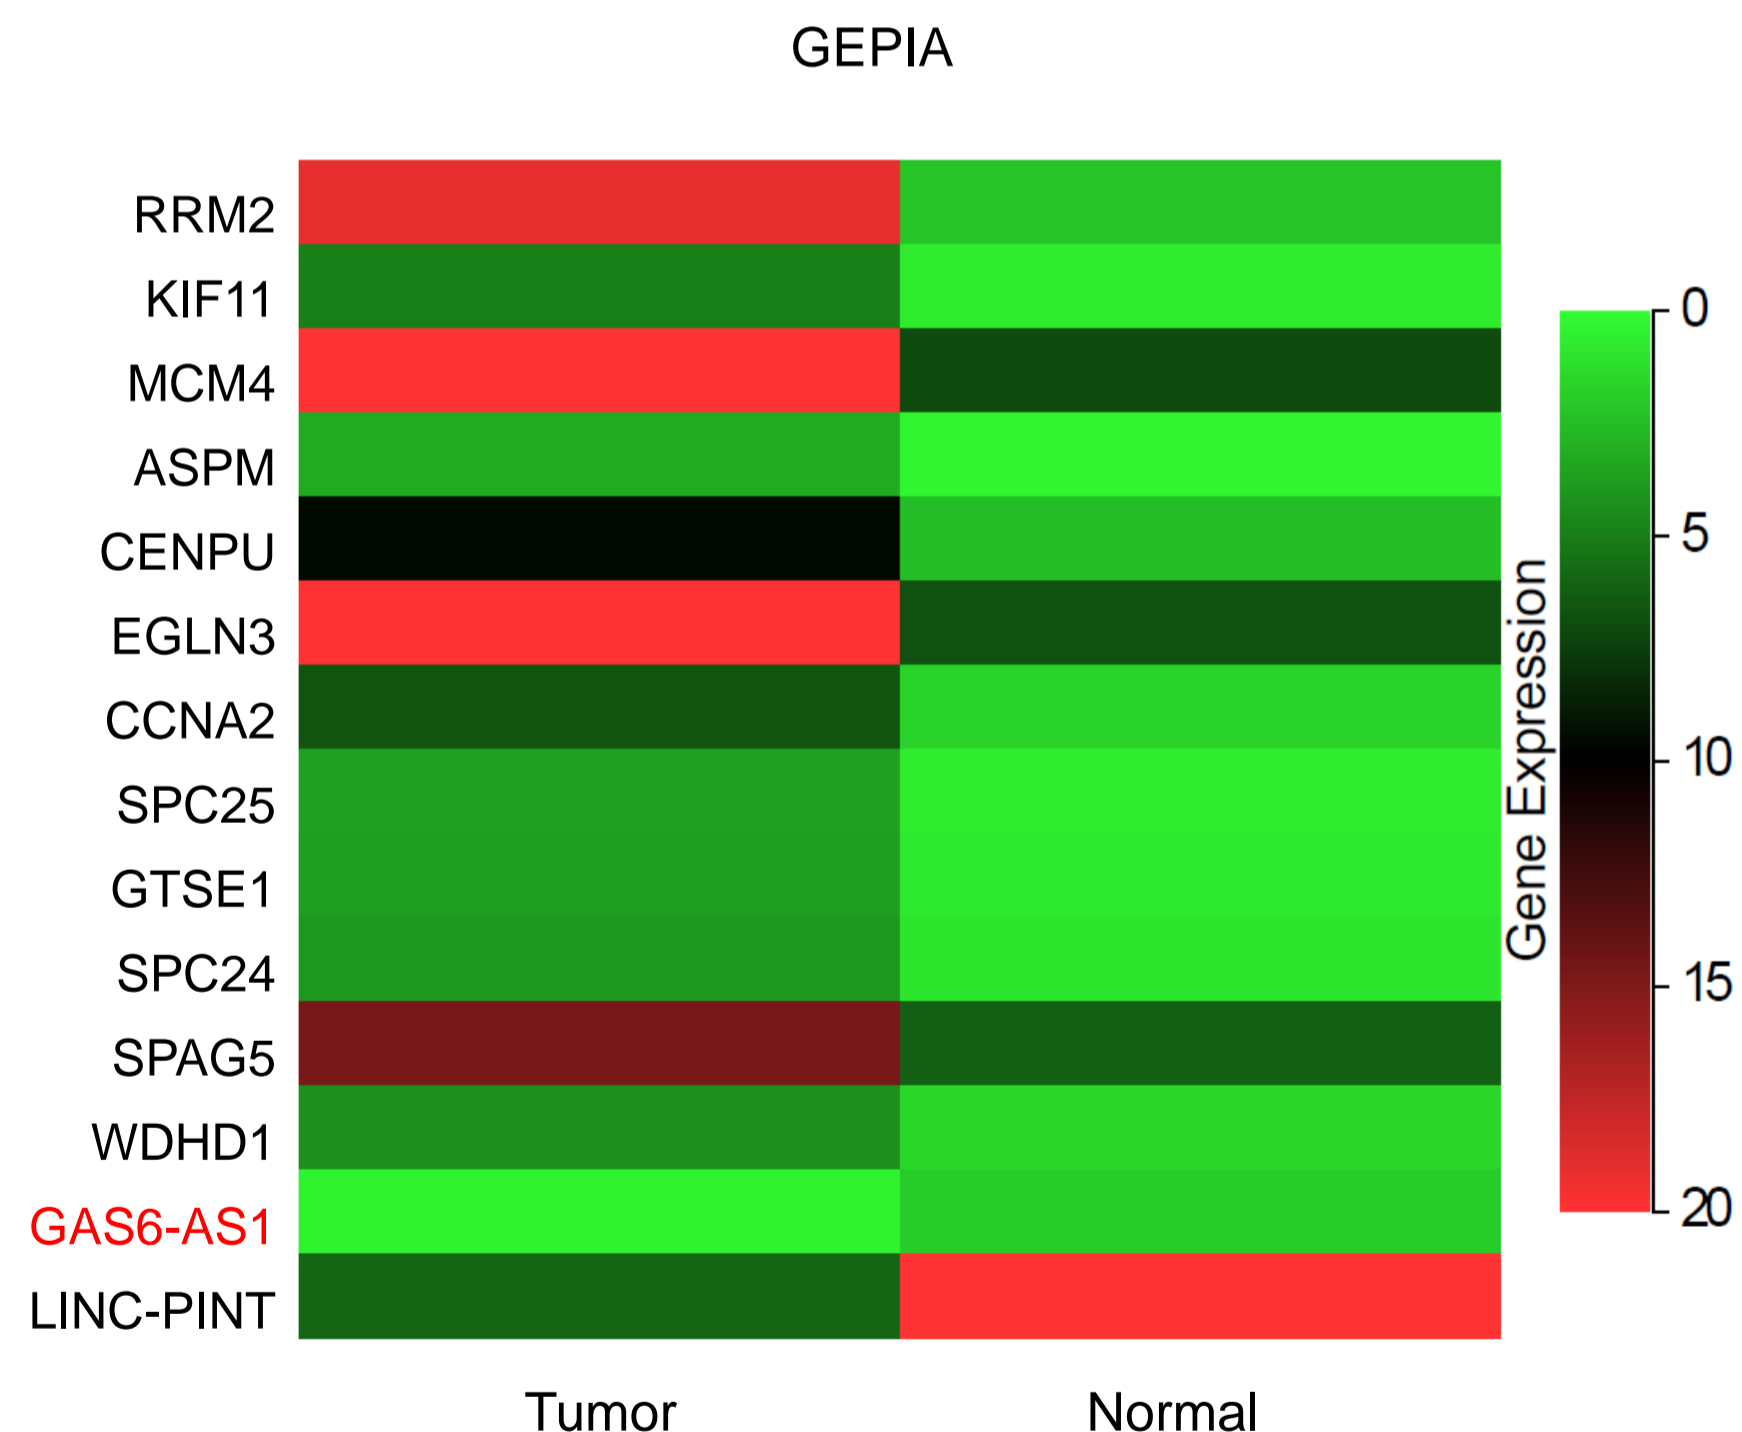

FigureS1. A. The flow chart for selecting lncRNAs that are abnormally expressed in glucose-free A549 cells and LUAD tissues, and meanwhile correlated with overall survival of LUAD patients. B. Heatmap of candidate genes that are abnormally expressed in A549 cells cultured with glucose and without glucose from GEO dataset (GSE56843). C. Heatmap of candidate genes that are abnormally expressed in LUAD tissues and normal tissues from GEPIA dataset.

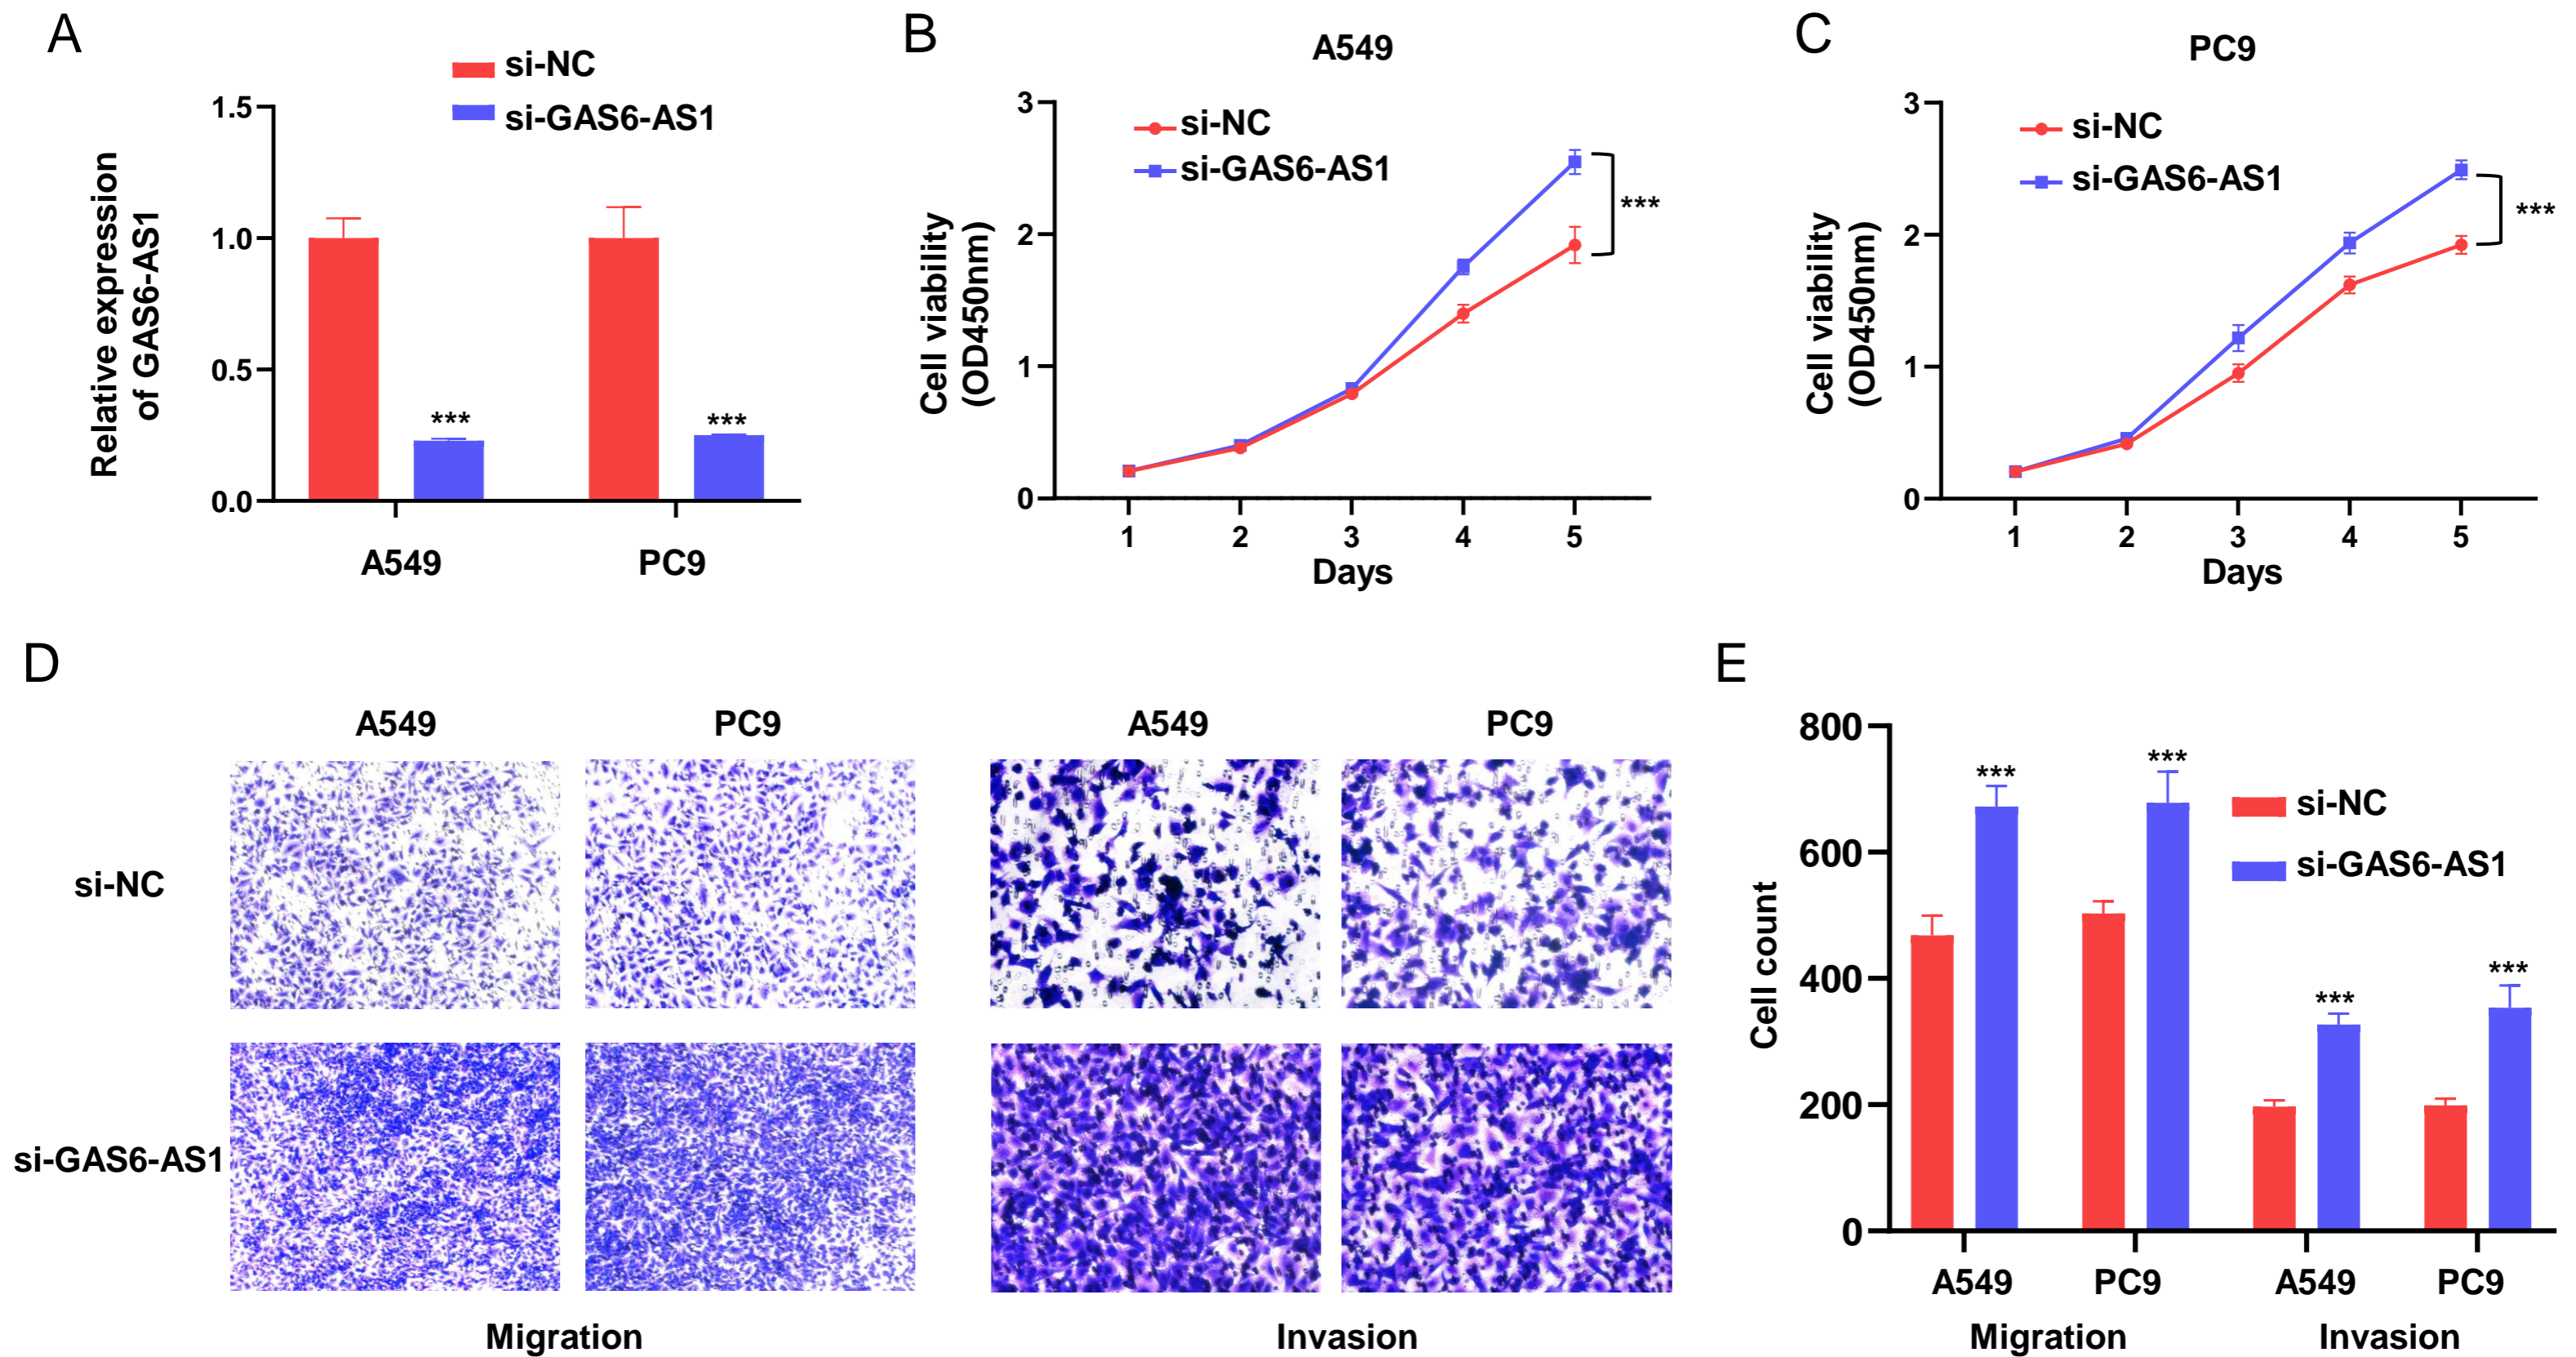

**FigureS2. A.** Transfection efficiency of siRNA targeting GAS6-AS1 was verified by qRT-PCR. **B-C.** CCK8 assays revealed that knockdown of GAS6-AS1 promoted proliferation of A549 and PC9 cells. **D-E.** Transwell and Matrigel assays indicated that knockdown of GAS6-AS1 promoted migration and invasion of A549 and PC9 cells.

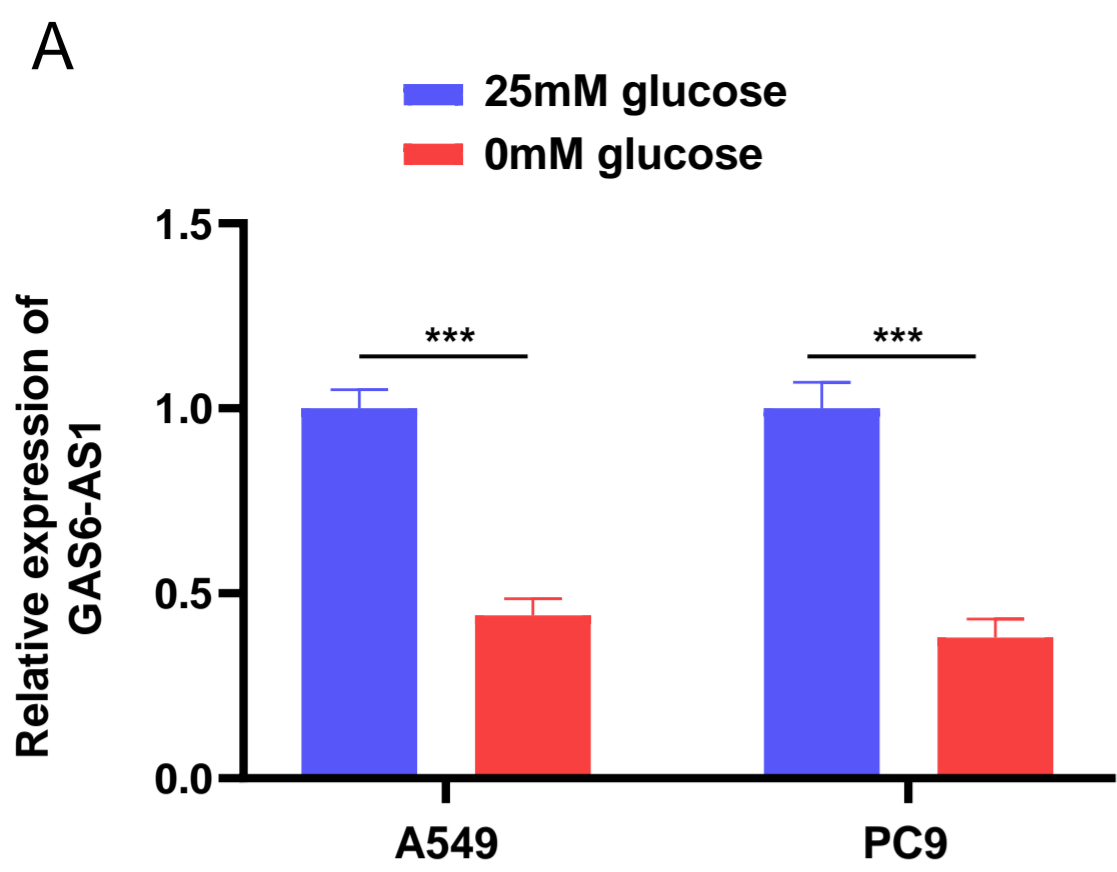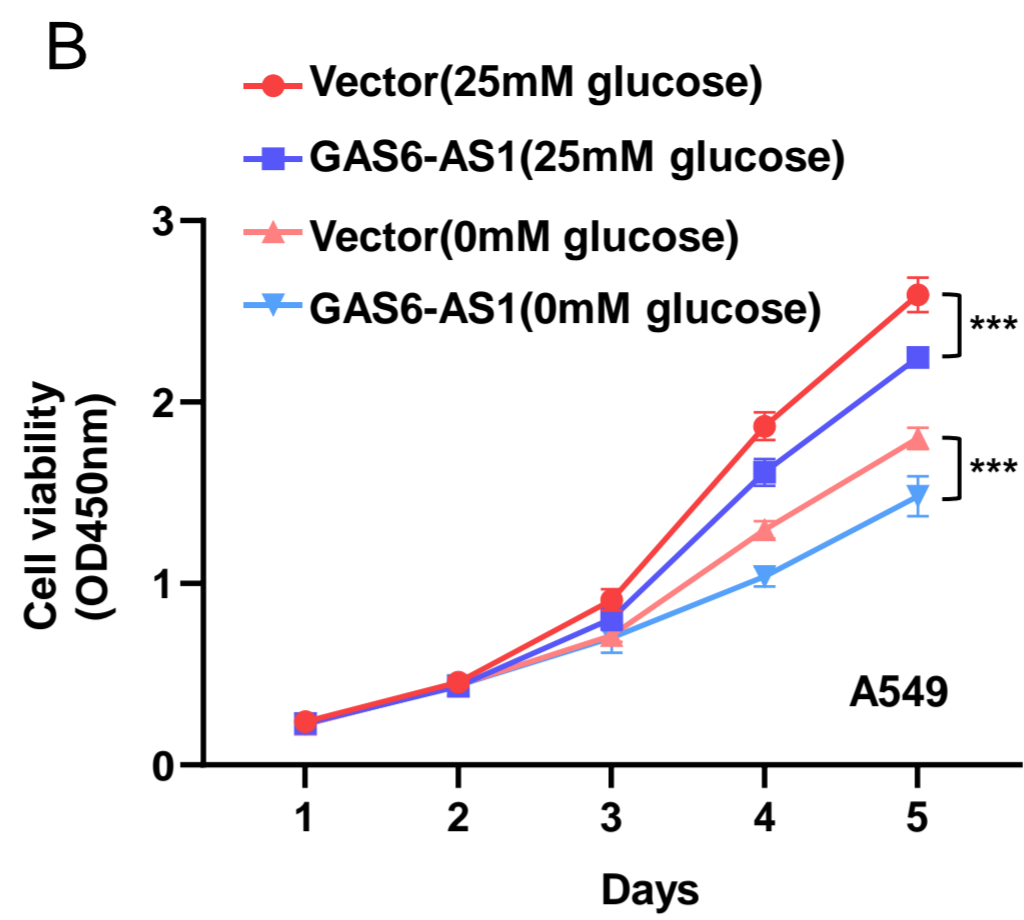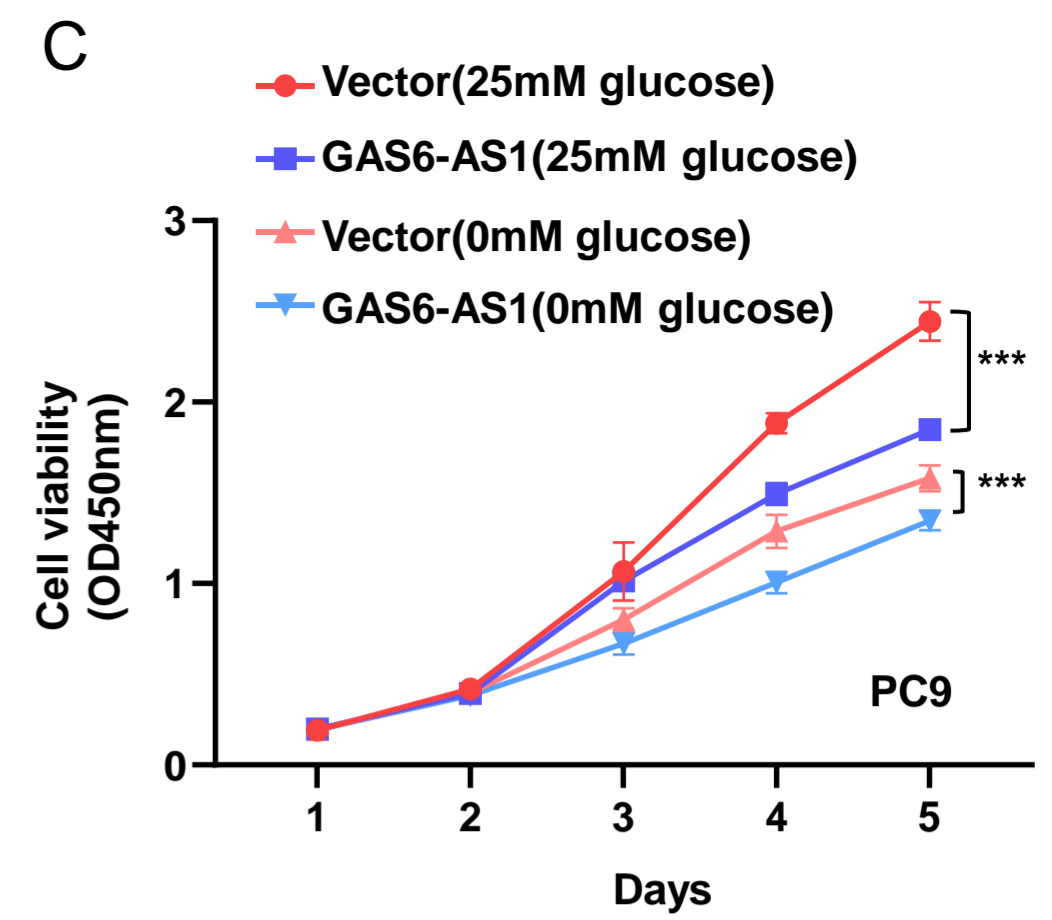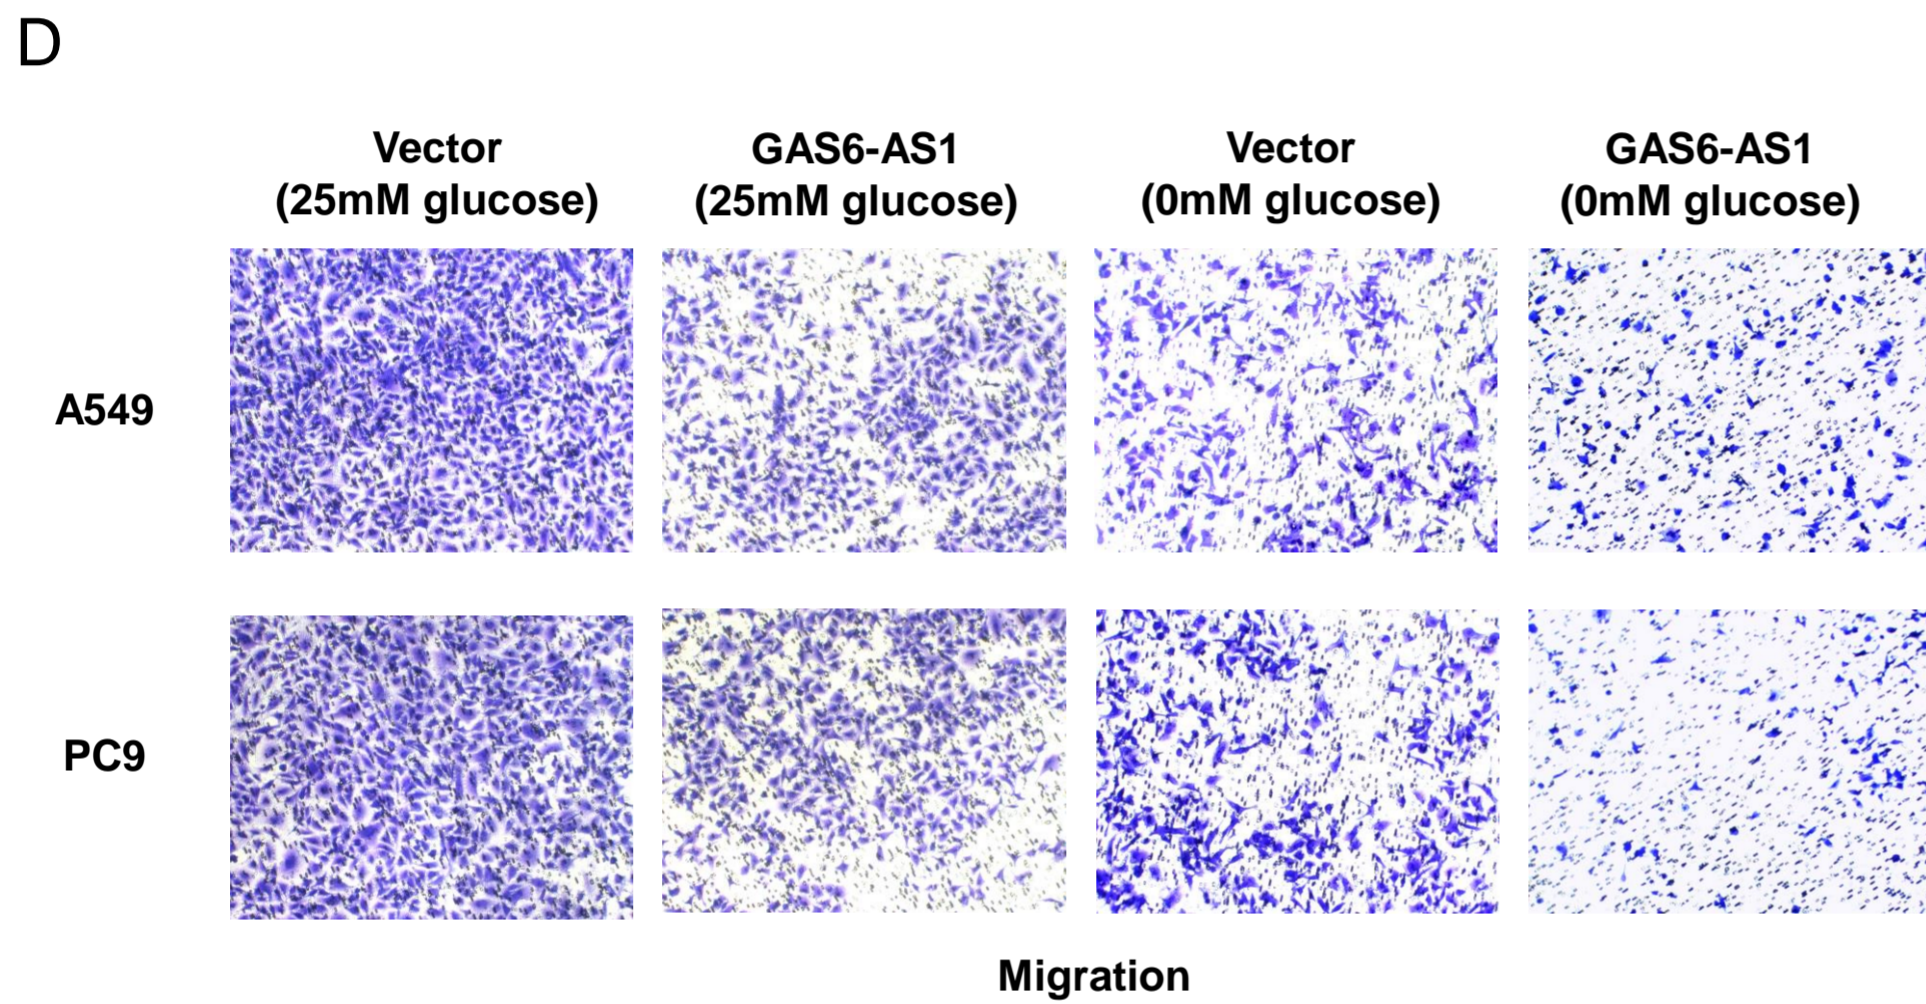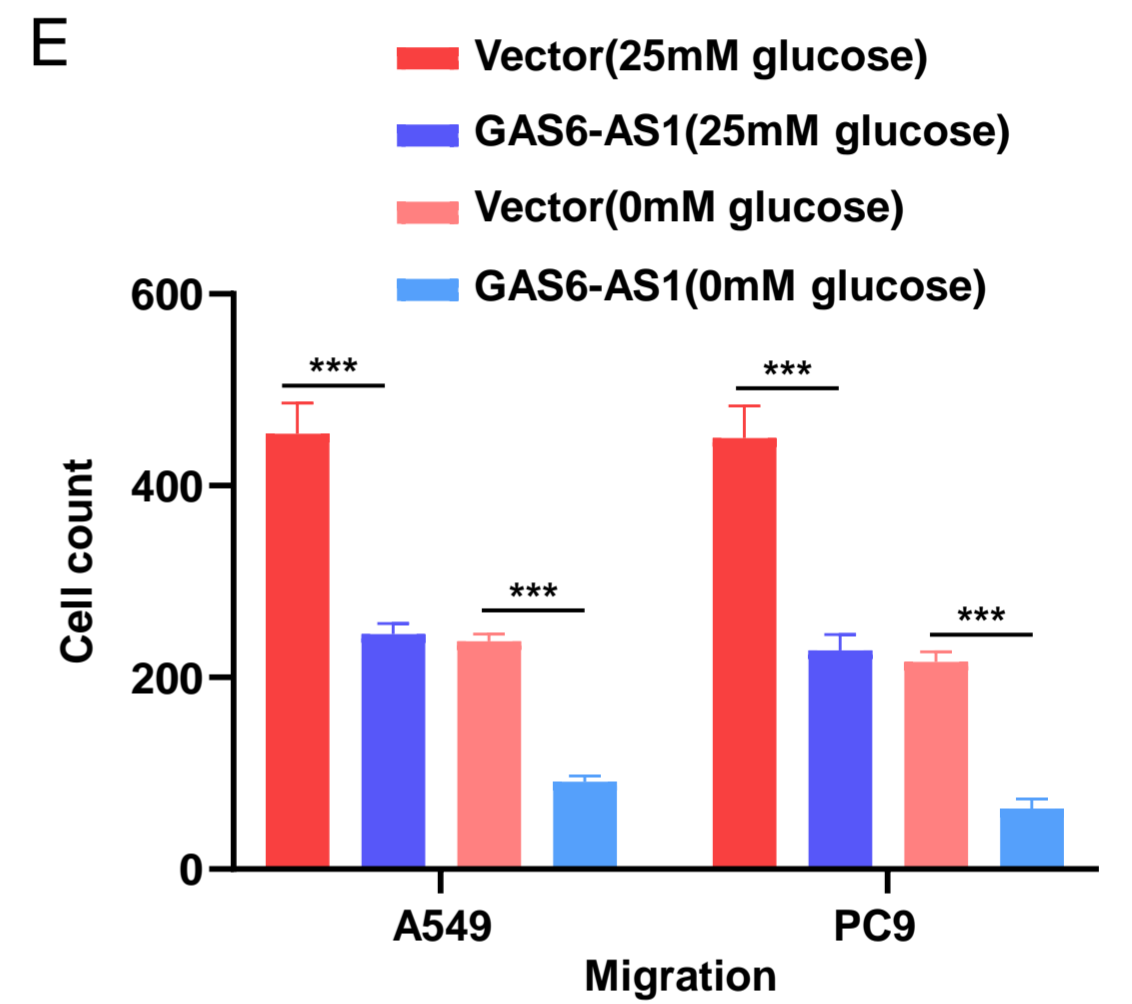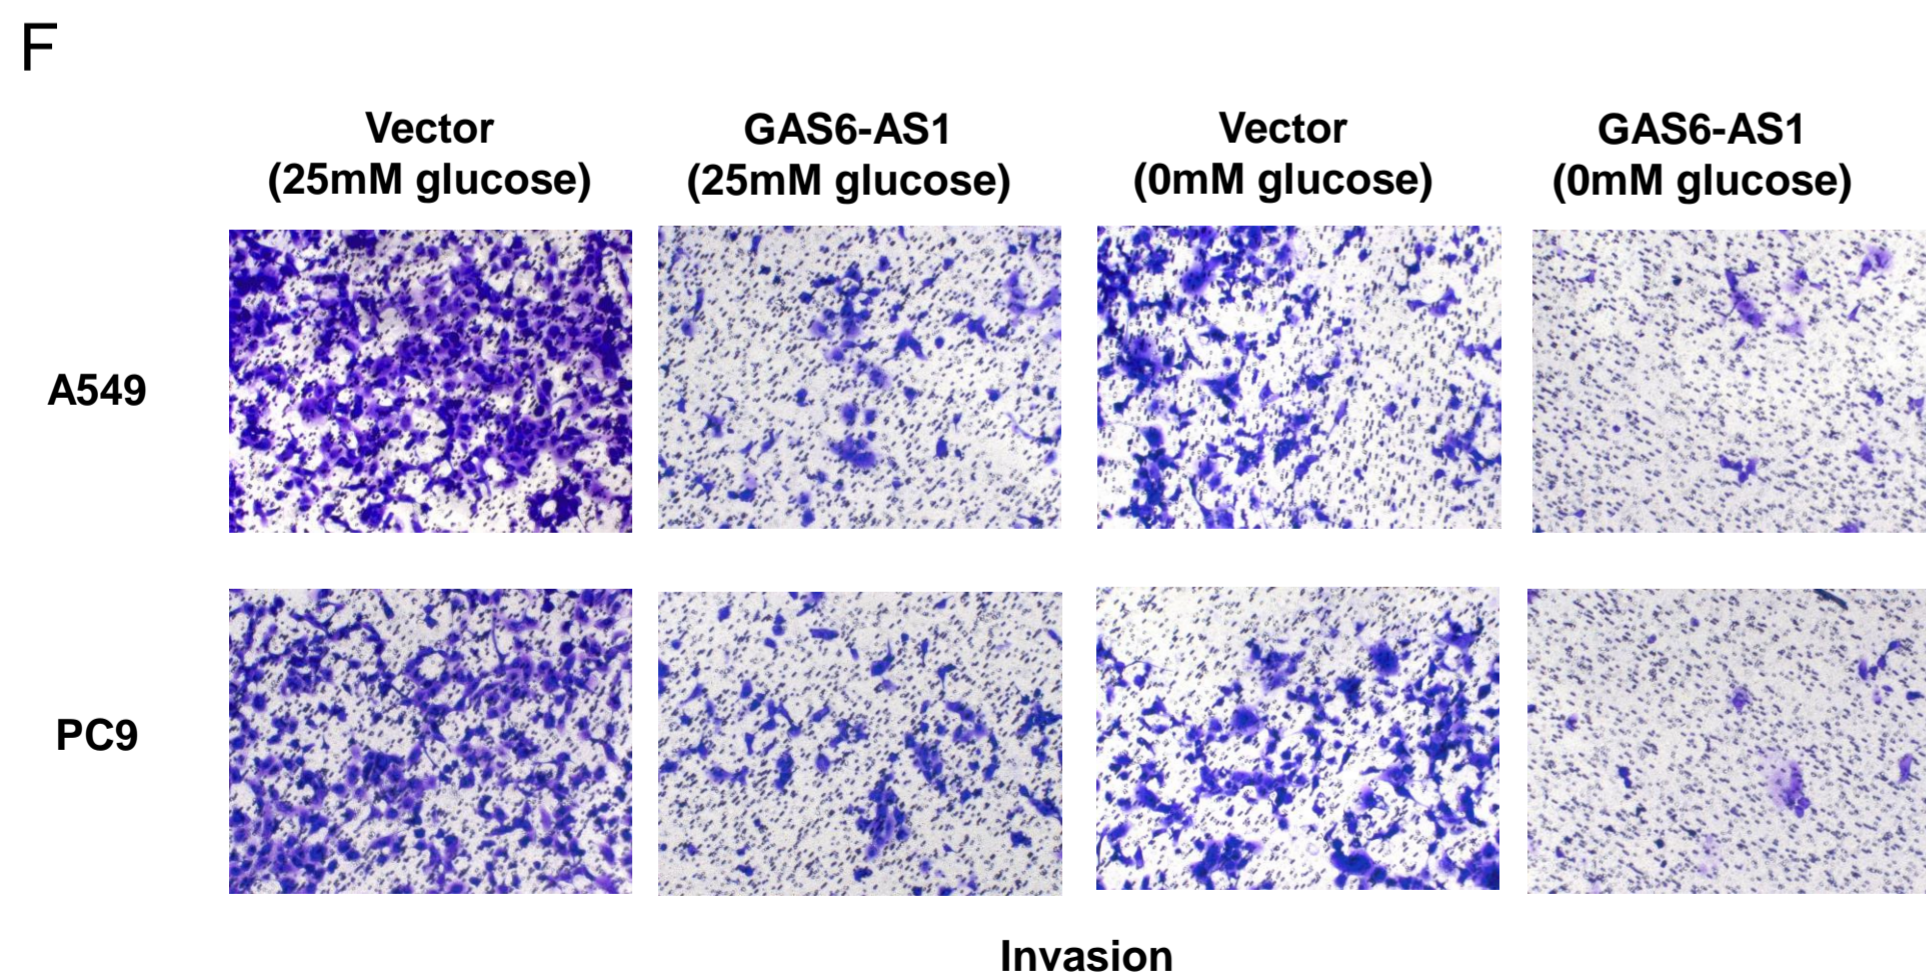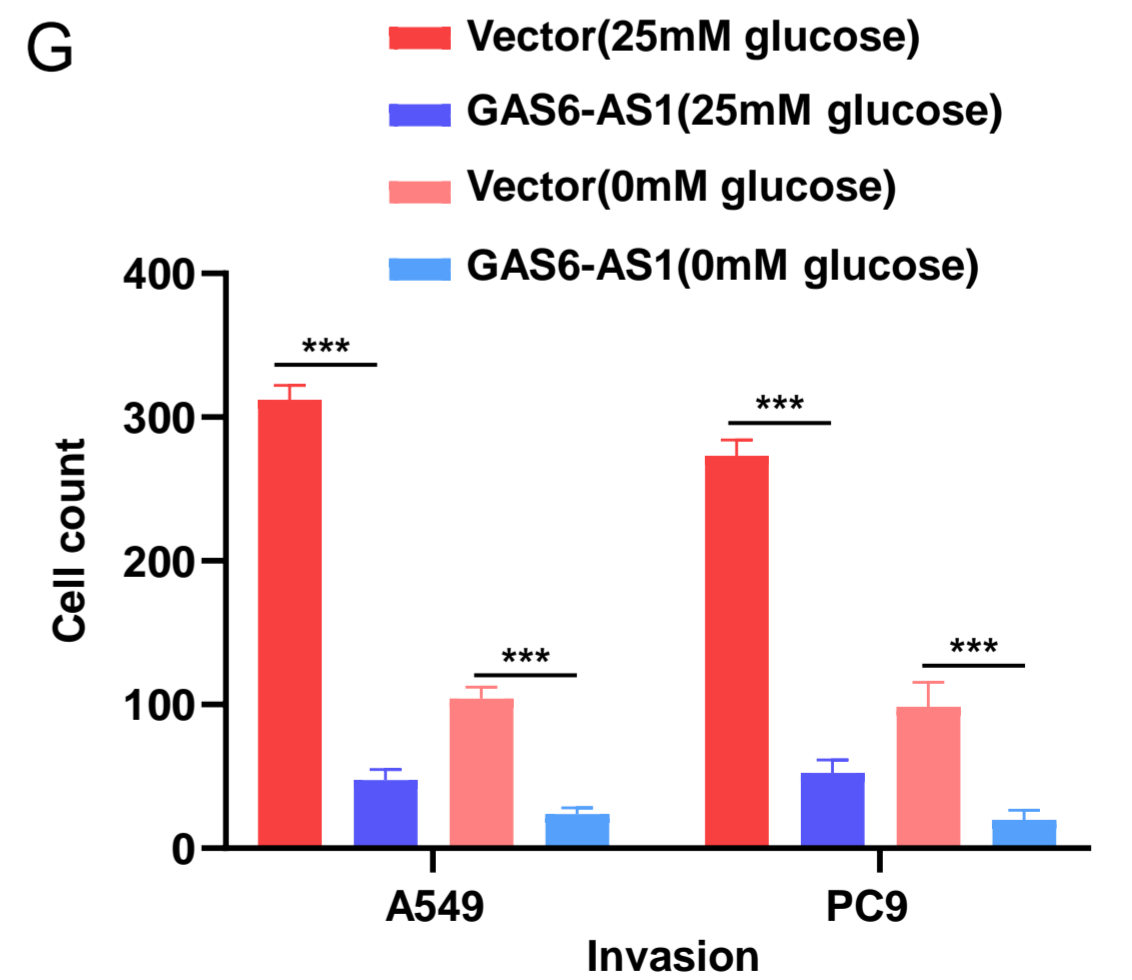

**FigureS3. A. GAS6-AS1 was downregulated by glucose starvation (0mM) in A549 and PC9 cells. B-C. Ectopic expression of GAS6-AS1 inhibited proliferation of A549 and PC9 cells in both glucose-sufficient and glucose-free conditions. D-G. Ectopic expression of GAS6-AS1 inhibited migration and invasion of A549 and PC9 cells in both glucose-sufficient and glucose-free conditions.**

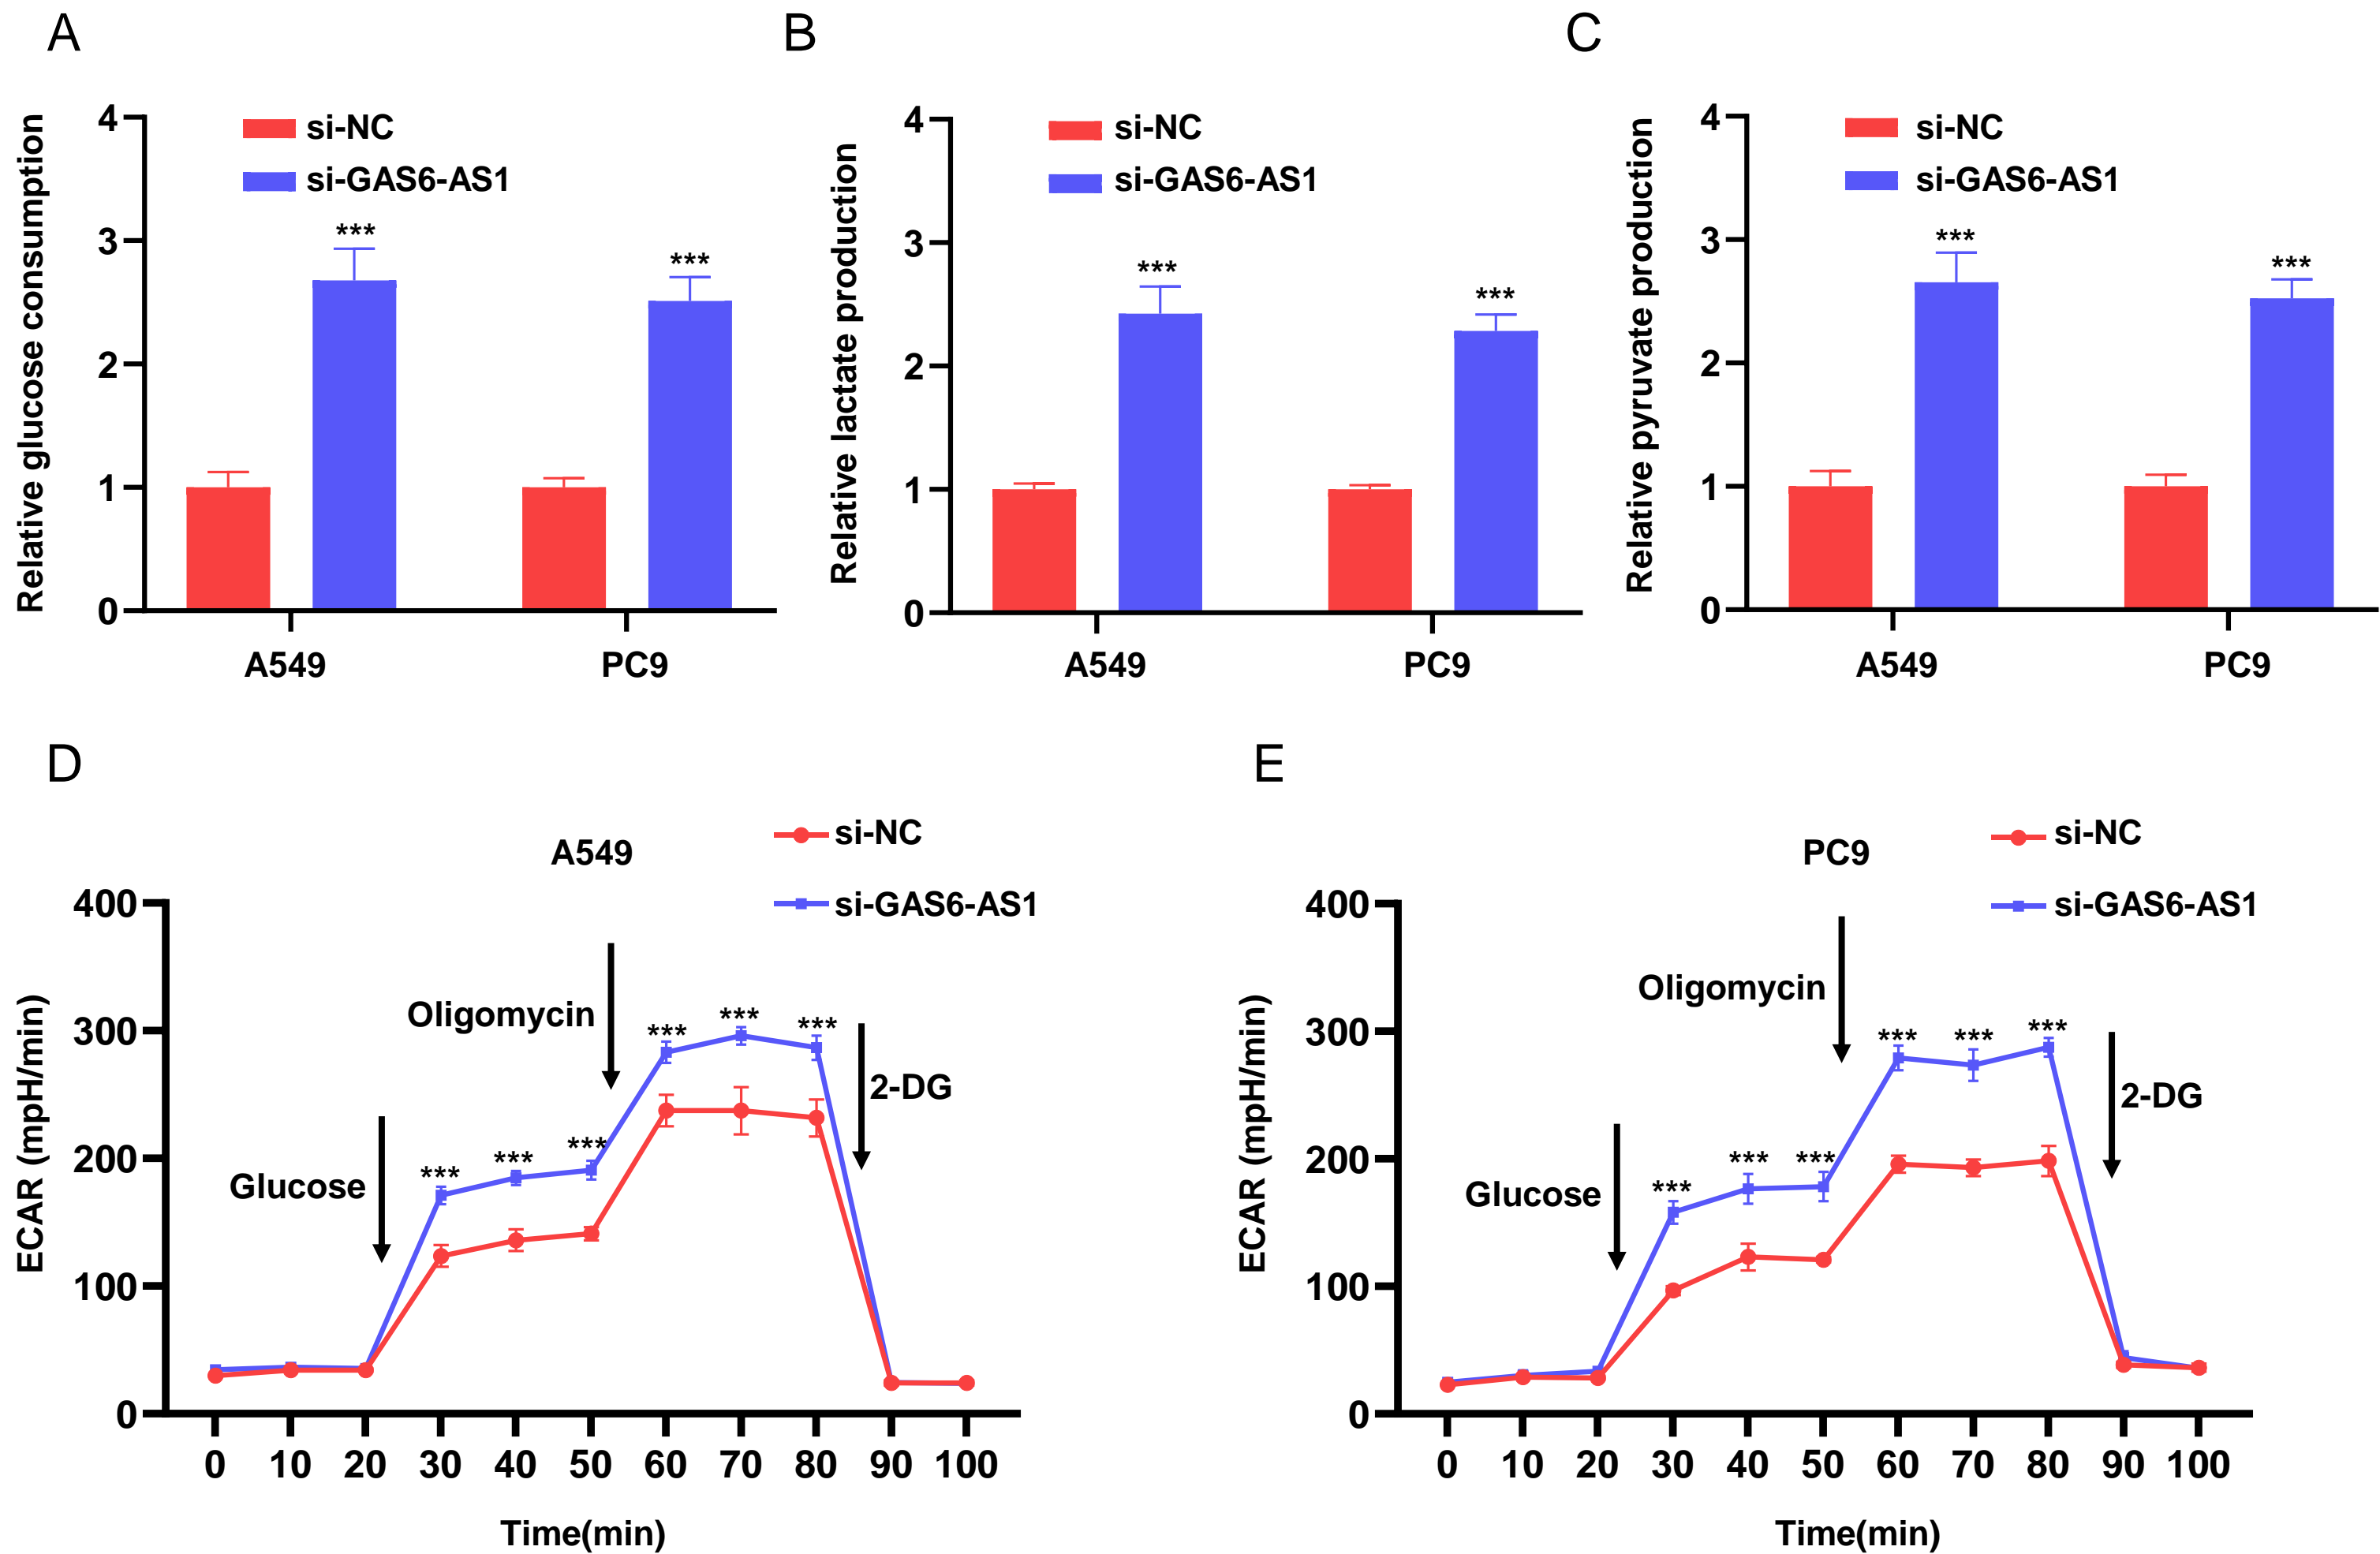

**FigureS4. A-C.** Knockdown of GAS6-AS1 promoted glucose consumption, lactate production and pyruvate production of A549 and PC9 cells. **D-E.** Seahorse analysis revealed that knockdown of GAS6-AS1 increased extracellular acidification rate (ECAR) of A549 and PC9 cells.

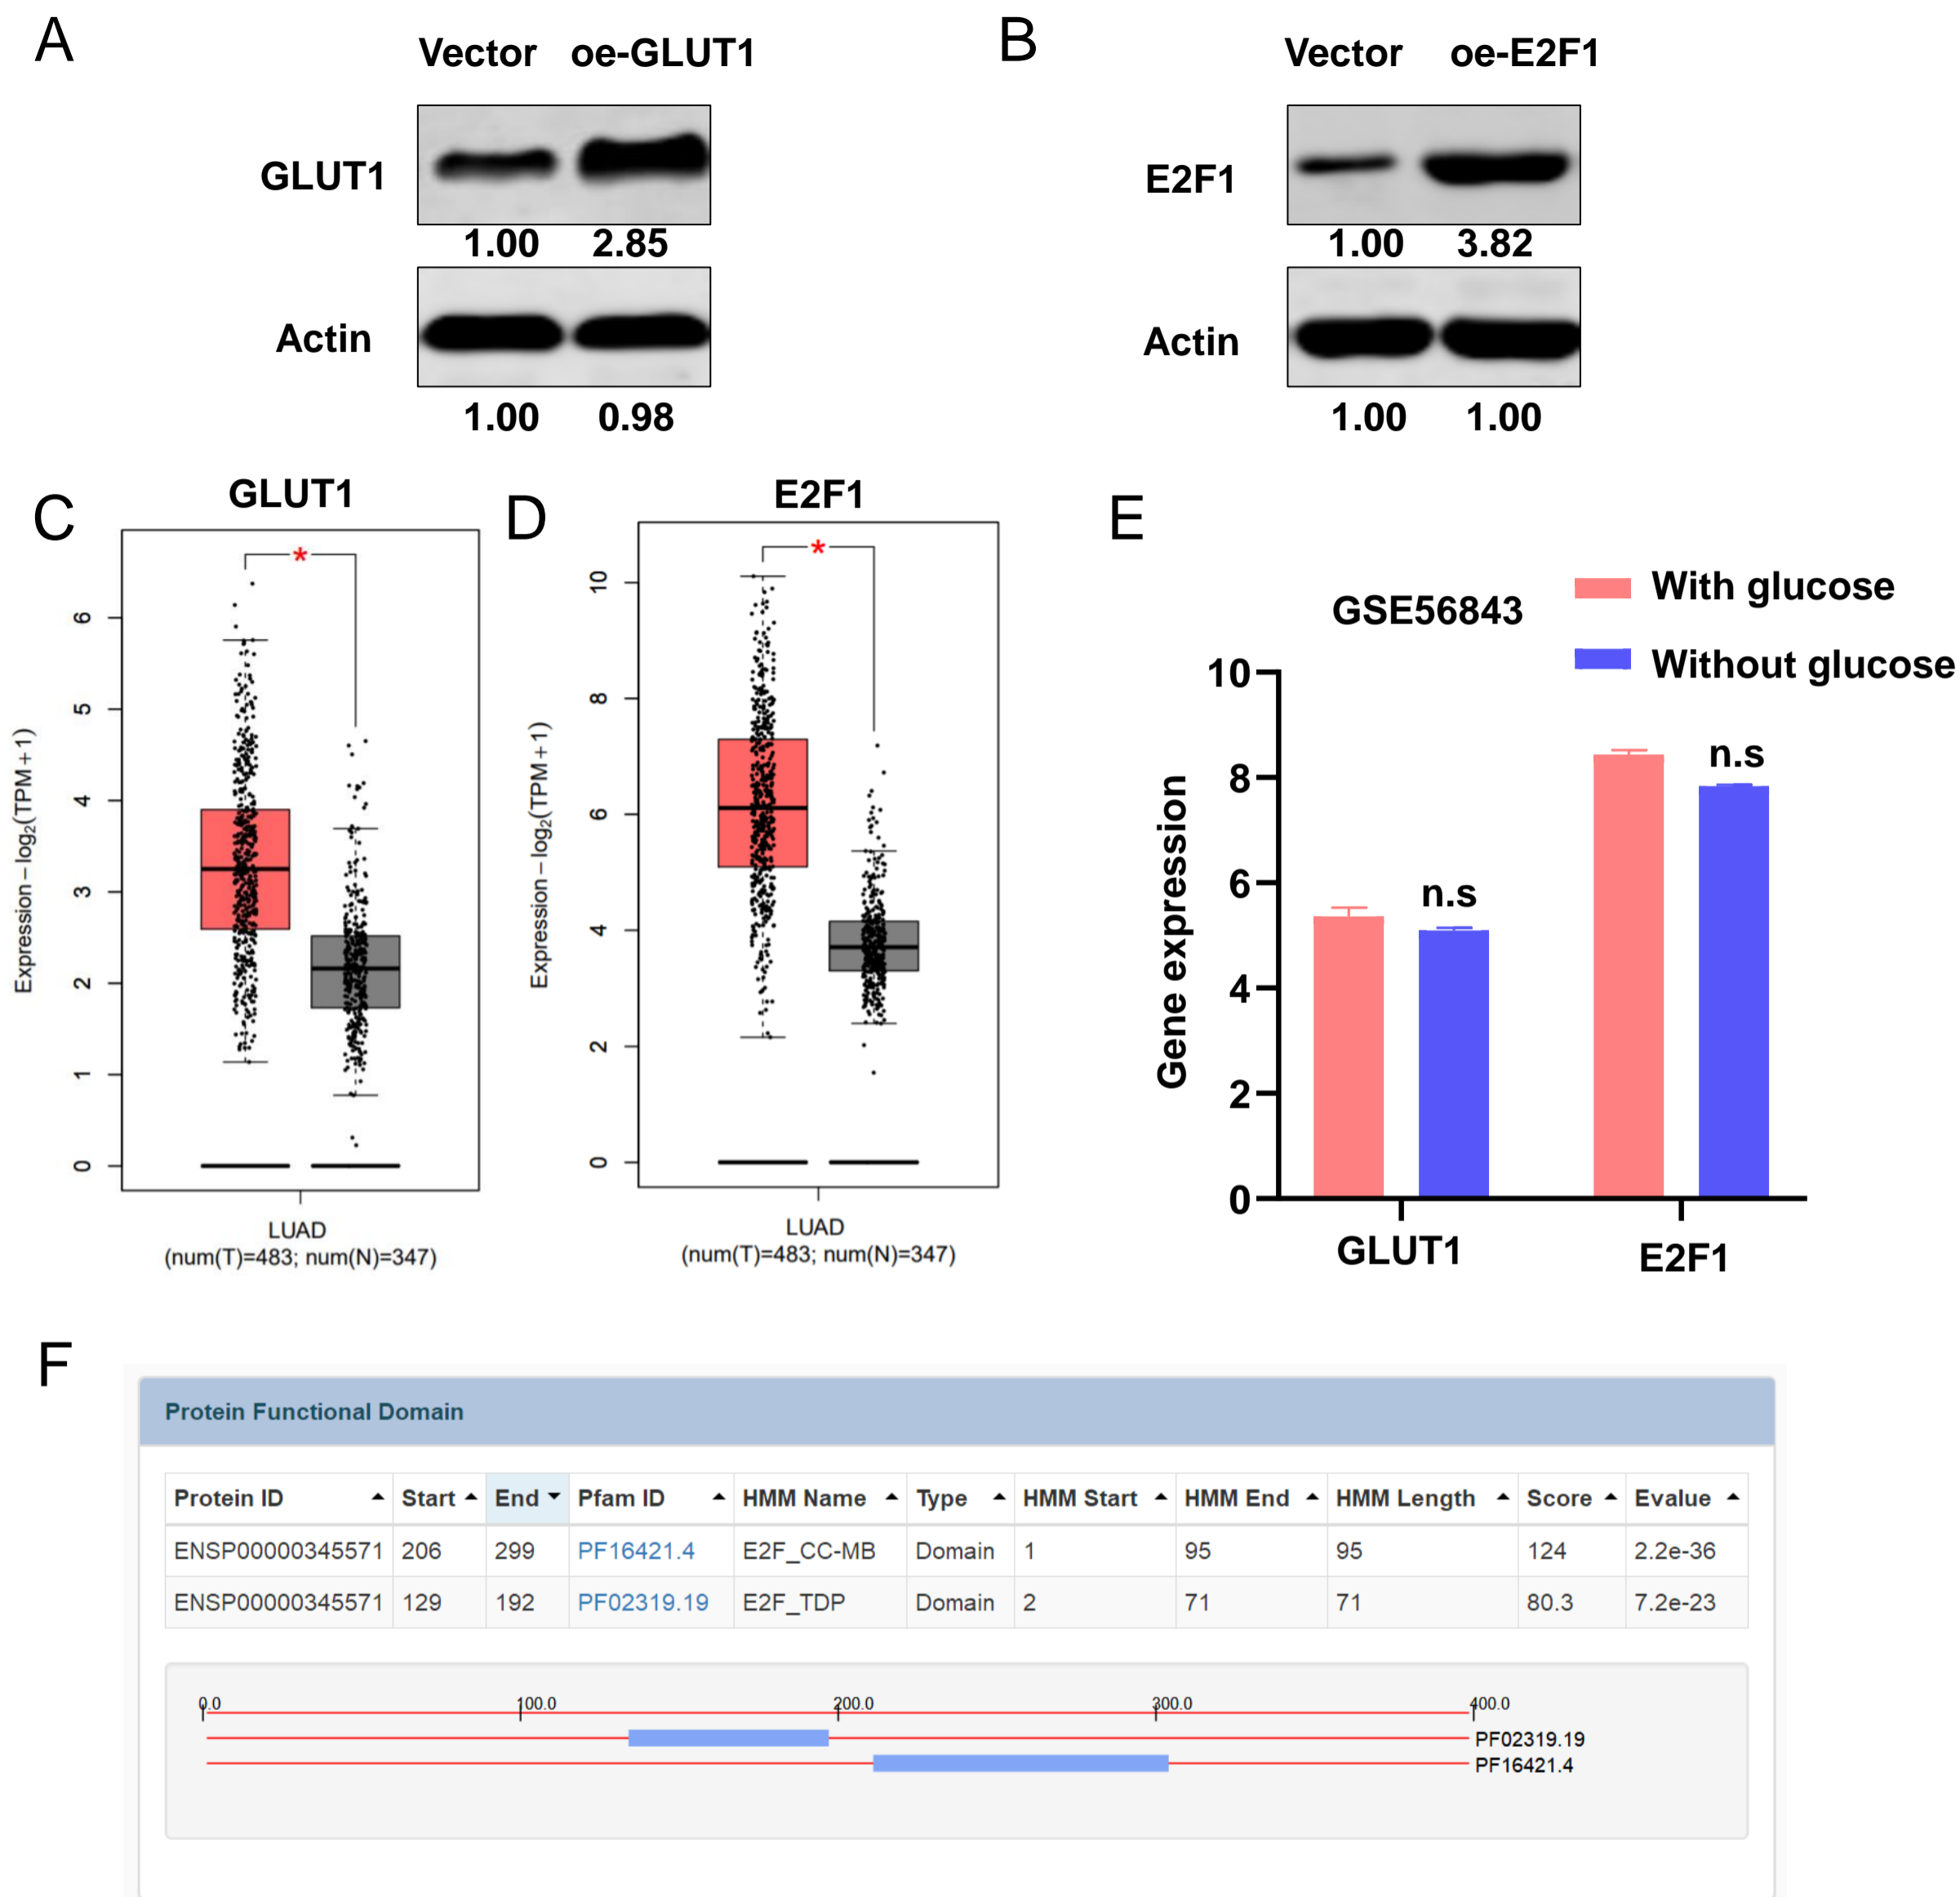

**FigureS5.** A. The western blot data for overexpression of GLUT1 in A549 cells. B. The western blot data for overexpression of E2F1 in A549 cells. C-D. GLUT1 and E2F1 were upregulated in LUAD tissues. E. The expression of GLUT1 and E2F1 were not altered under glucose-free conditions in LAUD cells. F. Protein function domain of E2F1 was presented.

A

Human (hg38): The binding site of E2F1 located within 1kb downstream of SLC2A1 gene in (sample HUMHG04230)

|                       |                         |                                             |
|-----------------------|-------------------------|---------------------------------------------|
| E2F1: binding site[1] | Regulatory range        | within downstream 1kb                       |
|                       | Gene reference id       | ENSG00000117394.19                          |
|                       | Official gene symbol    | SLC2A1                                      |
|                       | TSS ⓘ                   | chr1:42959173                               |
|                       | Gene type               | protein_coding                              |
|                       | E2F1 binding locus      | chr1:42958143-42959037, Summit: 42958590    |
|                       | Binding site distance ⓘ | -583                                        |
|                       | Motif locus             | chr1:42958609-42958622[-], Summit: 42958616 |
|                       | Motif distance ⓘ        | 42958616                                    |

B

| Matrix ID | Name | Score   | Relative score | Sequence ID | Start | End  |
|-----------|------|---------|----------------|-------------|-------|------|
| MA0024.2  | E2F1 | 12.048  | 0.949280746886 | GLUT1       | 1221  | 1231 |
| MA0024.2  | E2F1 | 6.24431 | 0.861965549557 | GLUT1       | 156   | 166  |
| MA0024.2  | E2F1 | 5.46131 | 0.850185526374 | GLUT1       | 1150  | 1160 |
| MA0024.2  | E2F1 | 5.271   | 0.847322335162 | GLUT1       | 974   | 984  |
| MA0024.2  | E2F1 | 5.09514 | 0.844676663351 | GLUT1       | 1237  | 1247 |
| MA0024.2  | E2F1 | 5.06681 | 0.844250434081 | GLUT1       | 71    | 81   |
| MA0024.2  | E2F1 | 5.06681 | 0.844250434081 | GLUT1       | 1253  | 1263 |

FigureS6. A. The targeting of E2F1 with GLUT1 gene in ChIPBase. B. E2F1 potentially bound to the promoter region of GLUT1 in JASPAR.

**TableS1. Correlation between GAS6-AS1 expression and clinicalpathological characteristics of LUAD.**

| <b>Characteristics</b>       | <b>low GAS6-AS1<br/>expression group (n=40)</b> | <b>high GAS6-AS1<br/>expression group (n=40)</b> | <b><math>\chi^2</math></b> | <b>p-Value</b> |
|------------------------------|-------------------------------------------------|--------------------------------------------------|----------------------------|----------------|
| <b>Tumor diameter</b>        |                                                 |                                                  | <b>9.141</b>               | <b>0.002</b>   |
| >3cm                         | 21                                              | 19                                               |                            |                |
| $\leq$ 3cm                   | 8                                               | 32                                               |                            |                |
| <b>Lymph node metastasis</b> |                                                 |                                                  | <b>5.051</b>               | <b>0.0246</b>  |
| Yes                          | 23                                              | 13                                               |                            |                |
| No                           | 17                                              | 27                                               |                            |                |
| <b>Tumor metastasis</b>      |                                                 |                                                  | <b>5.000</b>               | <b>0.0253</b>  |
| Yes                          | 7                                               | 1                                                |                            |                |
| No                           | 33                                              | 39                                               |                            |                |
| <b>Tumor stage</b>           |                                                 |                                                  | <b>4.528</b>               | <b>0.0333</b>  |
| III-IV                       | 18                                              | 9                                                |                            |                |
| I-II                         | 22                                              | 31                                               |                            |                |



**TableS2: Gene clusters for GO enrichment analysis**

**TableS3: Primers used for qRT-PCR**

| Gene           | Forward (5'-3')         | Reverse (5'-3')          |
|----------------|-------------------------|--------------------------|
| ACTIN          | CATGTACGTTGCTATCCAGGC   | CTCCTTAATGTCACGCACGAT    |
| GAS6-AS1       | GTGGGTACTGCATTCCTACCG   | CTCTCCTCTGATGGCAGGAC     |
| GLUT1          | GGCCAAGAGTGTGCTAAAGAA   | ACAGCGTTGATGCCAGACAG     |
| GLUT2          | GCTGCTCAACTAATCACCATGC  | TGGTCCCAATTTTGAAAACCCC   |
| GLUT3          | GCTGGGCATCGTTGTTGGA     | GCACTTTGTAGGATAGCAGGAAG  |
| GLUT4          | TGGGCGGCATGATTTCCCTC    | GCCAGGACATTGTTGACCAG     |
| GLUT5          | GAGGCTGACGCTTGTGCTT     | CCACGTTGTACCCATACTGGA    |
| HK2            | TGCCACCAGACTAAACTAGACG  | CCCGTGCCCAACAATGAGAC     |
| ALDOC          | ATGCCTCACTCGTACCCAG     | TTCCACCCCAATTTGGCTCA     |
| ENO1           | AAAGCTGGTGCCGTTGAGAA    | GGTTGTGGTAAACCTCTGCTC    |
| PKM            | AGGGCACTGGGCTGTTGTTT    | TGAGTGGAGGGTGGGGACAG     |
| LDH            | TCCGGATCTCATTGCCACGC    | GCCATGCCAACAGCACCAAC     |
| U6             | CTTCGGCAGCACATATACTAAAA | CGCTTCACGAATTTGCGTGTTCAT |
| GAPDH          | ACAACCTTTGGTATCGTGGAAGG | GCCATCACGCCACAGTTTC      |
| GLUT1 promoter | AACGCAGAGAGAACGAGCCG    | GTGTGTCAGGGGTGTGTGGG     |
